# Supplementary material for: Recyclable ferroferric oxide@titanium dioxide@molybdenum disulfide with enhanced enzyme-like activity under visible light for effectively inhibiting the growth of drug-resistant bacteria in sewage
Source: Royal Society of Chemistry journal article supplement (doi:10.1039/d3tb00245d), 2023-01-01
Supplement: d3tb00245d1.pdf [file d3tb00245d1.pdf]

Electronic Supplementary Information

**Recyclable ferroferric oxide@titanium dioxide@molybdenum disulfide with enhanced enzyme-like activity under visible light for effectively inhibiting drug-resistant bacteria in sewage**

Yiping Sun,<sup>#,a</sup> Wenhui Yue,<sup>#,a</sup> Bin Niu,<sup>b</sup> Yu Lin,<sup>c</sup> Xiangyong Liu,<sup>c</sup> Tianming Wu,<sup>a</sup> Gong Zhang,<sup>d</sup> Ke Qu,<sup>\*,e</sup> Lu Wang,<sup>\*,a</sup> and Yusheng Niu<sup>\*,a,e</sup>

<sup>a</sup> Institute of Biomedical Engineering, College of Life Sciences, Qingdao University, Qingdao 266071, China

<sup>b</sup> Jinan Art School, Jinan 250002, China

<sup>c</sup> Yantai Center for Disease Control and Prevention, Yantai 264003, China

<sup>d</sup> Center for Water and Ecology, State Key Joint Laboratory of Environment Simulation and Pollution Control, School of Environment, Tsinghua University, Beijing 100084, China

<sup>e</sup> College of Materials and Chemistry & Chemical Engineering, Chengdu University of Technology, Chengdu 610059, China

<sup>f</sup> School of Tourism and Geography Science, Qingdao University, Qingdao 266071, China

<sup>#</sup> Yiping Sun and Wenhui Yue contributed equally to this work.

\*Correspondence: [quke18@cdut.edu.cn](mailto:quke18@cdut.edu.cn) (K. Qu); [LWang@qdu.edu.cn](mailto:LWang@qdu.edu.cn) (L. Wang);

[nys@qdu.edu.cn](mailto:nys@qdu.edu.cn) (Y. Niu)

### S1. Kinetic and reaction mechanism of the peroxidase-like activity of $\text{Fe}_3\text{O}_4@\text{TiO}_2@\text{MoS}_2$

The kinetic parameters and reaction mechanism of the POD-like behavior of  $\text{Fe}_3\text{O}_4@\text{TiO}_2@\text{MoS}_2$  were studied using the Michaelis equation. Kinetics study were performed in the acetate buffer (100 mM, pH 4.0) with the final concentration of  $\text{H}_2\text{O}_2$  (5 mM) and various concentrations of TMB (0.1–1.8 mM) or with the final concentration of TMB (1 mM) and diverse concentrations of  $\text{H}_2\text{O}_2$  (0.06–0.5 mM). The values of  $V_{\text{max}}$  and  $K_m$  were evaluated by the Equation (1), where  $[S]$ ,  $K_m$ ,  $V$ , and  $V_{\text{max}}$  are the substrate's concentration, Michaelis constant, initial velocity, and the maximal reaction velocity, respectively.

$$V = \frac{V_{\text{max}} \times [S]}{V_m + [S]} \quad (1)$$

**Statistical analysis:** All data are shown as mean  $\pm$  s.d.

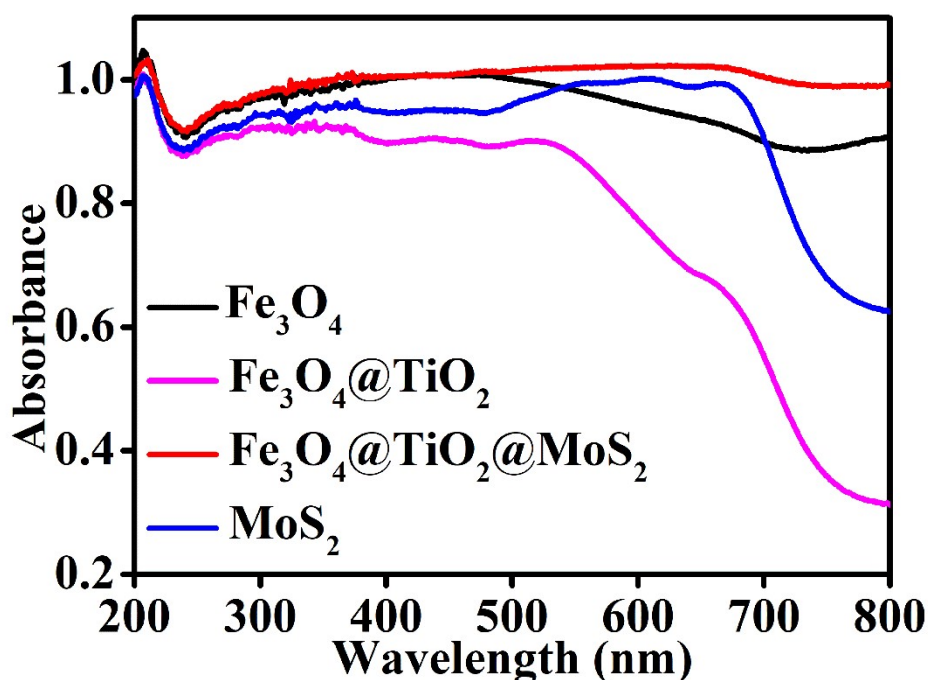

**Fig. S1.** UV-vis diffuse reflectance spectra of  $\text{Fe}_3\text{O}_4$ ,  $\text{Fe}_3\text{O}_4@\text{TiO}_2$ ,  $\text{Fe}_3\text{O}_4@\text{TiO}_2@\text{MoS}_2$ , and  $\text{MoS}_2$ .

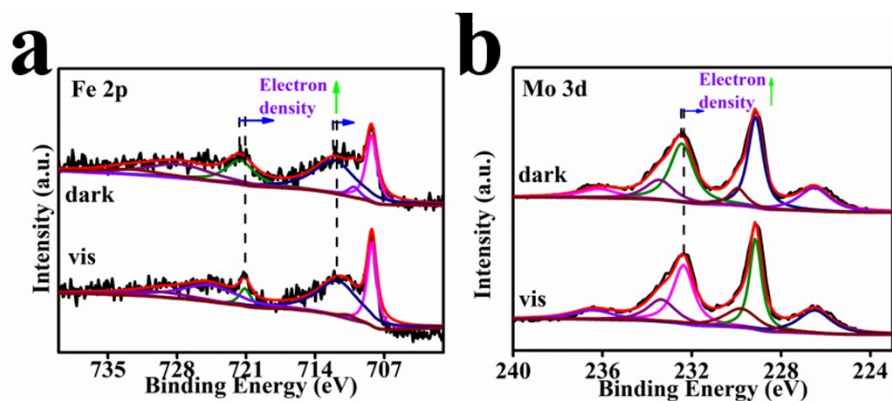

**Fig. S2.** High-resolution XPS for Fe 2p (a) and Mo 3d (b) of  $\text{Fe}_3\text{O}_4@\text{TiO}_2@\text{MoS}_2$  in the dark ( $\text{Fe}_3\text{O}_4@\text{TiO}_2@\text{MoS}_2$  (Dark)) or under the visible light irradiation from the Xe lamp with a 430 nm cutoff filter ( $\text{Fe}_3\text{O}_4@\text{TiO}_2@\text{MoS}_2$  (Vis)).

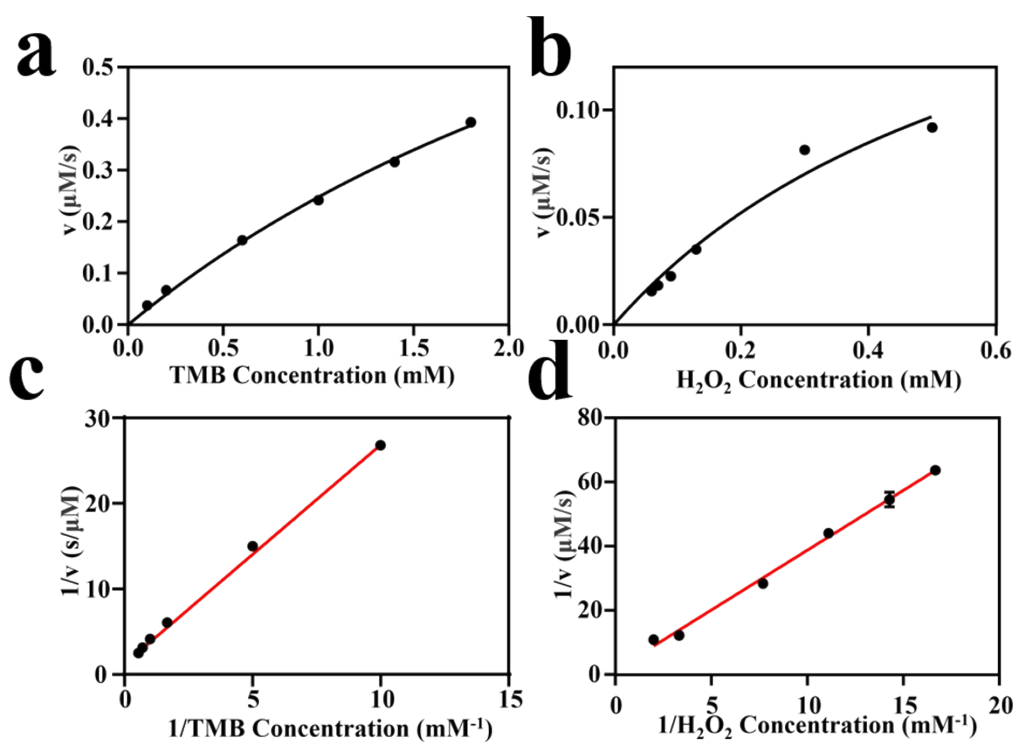

**Fig. S3.** Steady-state kinetics of the peroxidase-like activity of the  $\text{Fe}_3\text{O}_4@\text{TiO}_2@\text{MoS}_2$ .

a, c) The concentration of  $\text{H}_2\text{O}_2$  was fixed, and the concentration of TMB changed; b, d) The concentration of TMB was fixed and the concentration of  $\text{H}_2\text{O}_2$  changed; The error bars represent the standard deviation for three measurements ( $n = 3$ ).

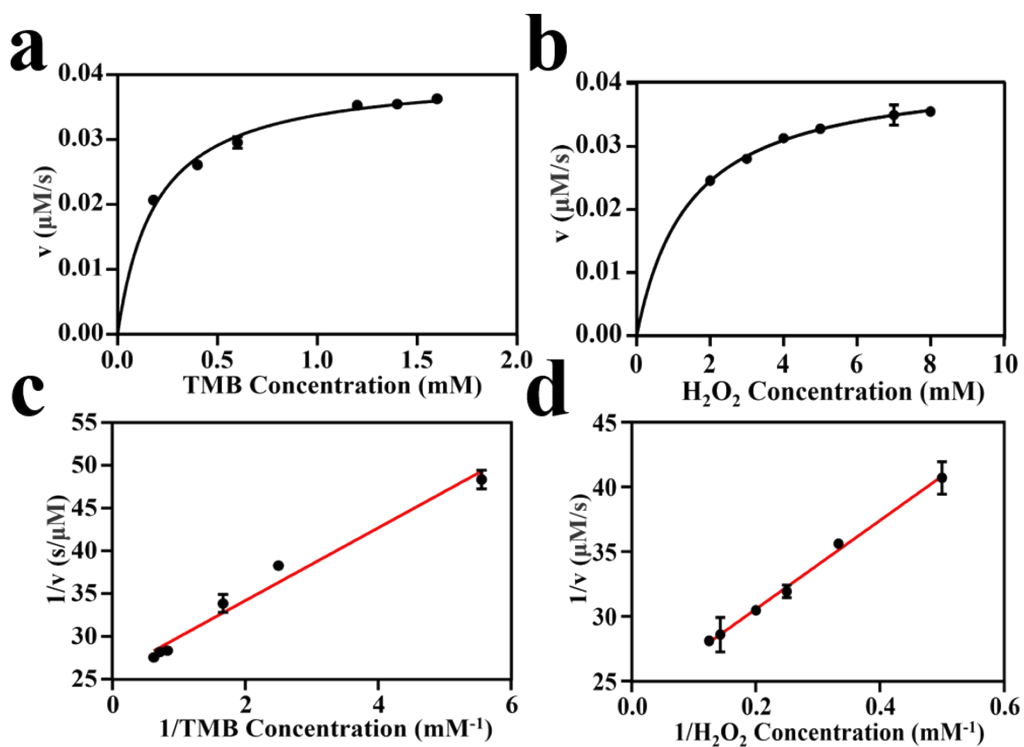

**Fig. S4.** Steady-state kinetics of the peroxidase-like activity of the MoS<sub>2</sub>. a, c) The concentration of H<sub>2</sub>O<sub>2</sub> was fixed, and the concentration of TMB changed; b, d) The concentration of TMB was fixed and the concentration of H<sub>2</sub>O<sub>2</sub> changed; The error bars represent the standard deviation for three measurements ( $n = 3$ ).

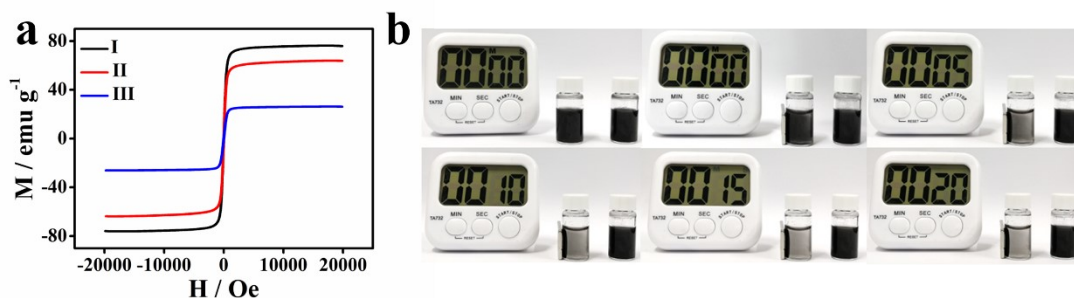

**Fig. S5.** (a) The magnetic hysteresis loops of  $\text{Fe}_3\text{O}_4$ (I),  $\text{Fe}_3\text{O}_4@\text{TiO}_2$ (II), and  $\text{Fe}_3\text{O}_4@\text{TiO}_2@\text{MoS}_2$ (III) and (b) physical drawing of magnetic separation of  $\text{Fe}_3\text{O}_4@\text{TiO}_2@\text{MoS}_2$ .

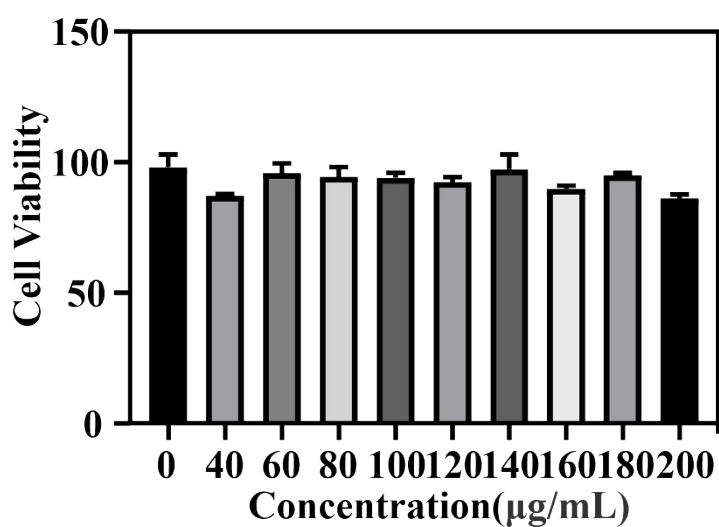

**Fig. S6.** MTT cytotoxicity assay: The viability of L929 cells treated with different sizes of  $\text{Fe}_3\text{O}_4@\text{TiO}_2@\text{MoS}_2$  was used as an example. Error bars indicate the standard deviation of the three measured values ( $n = 3$ ).

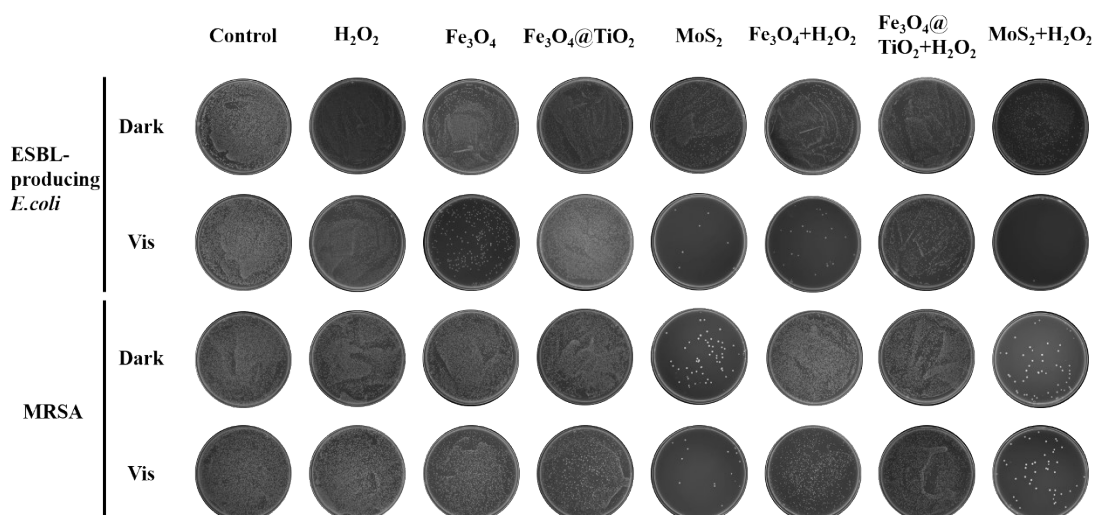

**Fig. S7.** Colony plots of the inhibition effect of different treatments on ESBL-producing *E. coli* and MRSA.

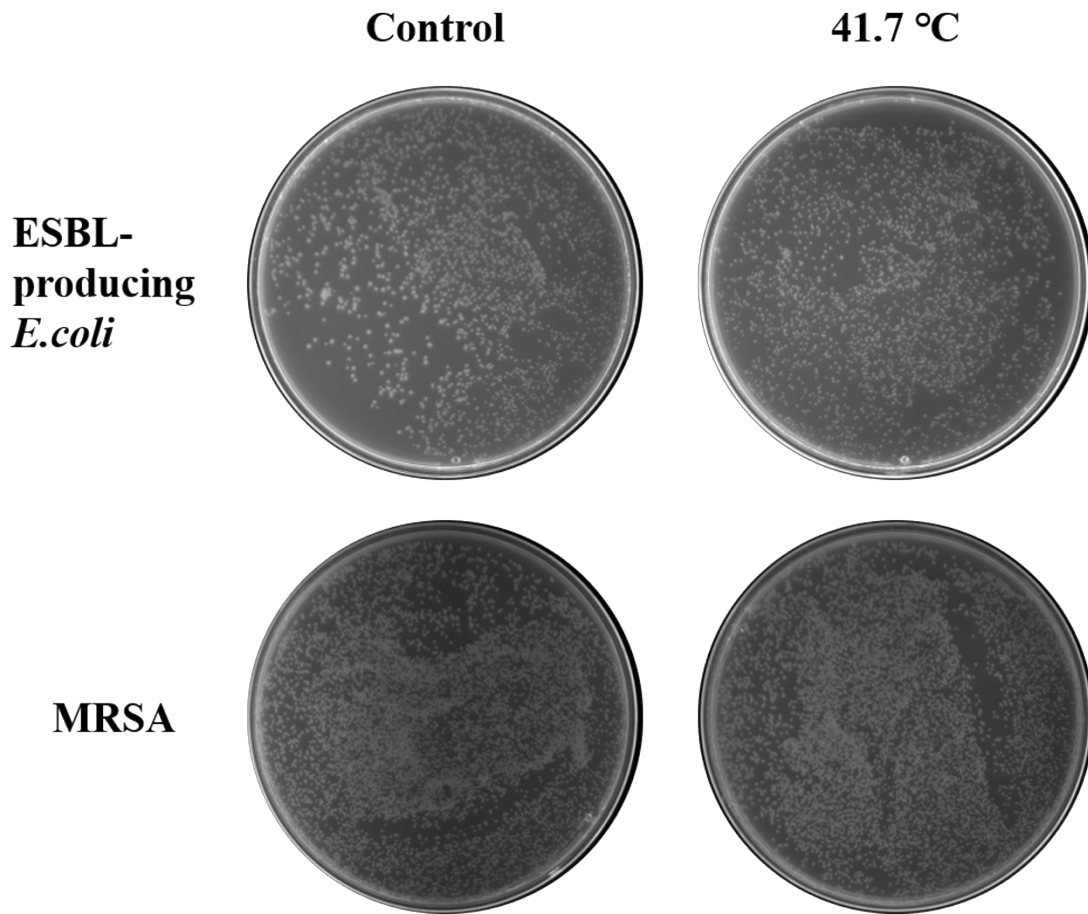

**Fig. S8.** Colony diagram of the inhibition effect of low-temperature treatment on ESBL-producing *E. coli* and MRSA.

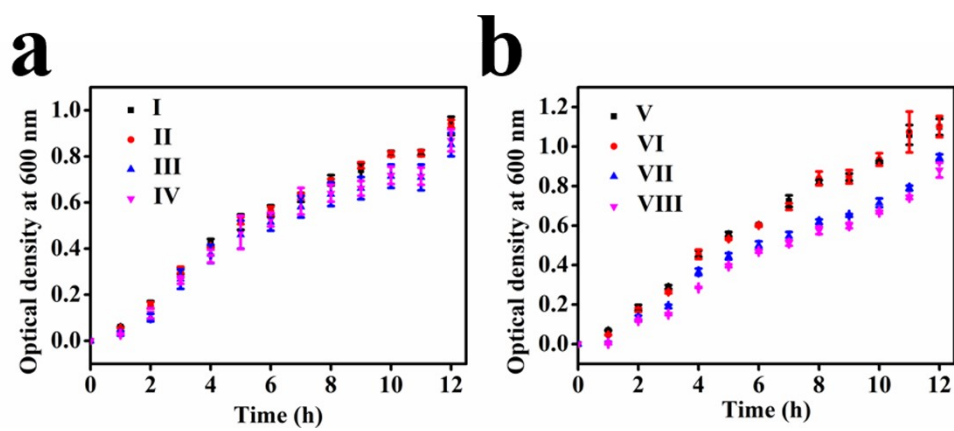

**Fig. S9.** The growth curves of MRSA under (a) dark conditions and (b) visible light irradiation. Cultured bacterial cells were treated with (I/V) Sterile water as control,

(II/VI) H<sub>2</sub>O<sub>2</sub>, (III/VII) Fe<sub>3</sub>O<sub>4</sub>@TiO<sub>2</sub>@MoS<sub>2</sub>, and (IV/VIII)

Fe<sub>3</sub>O<sub>4</sub>@TiO<sub>2</sub>@MoS<sub>2</sub>+H<sub>2</sub>O<sub>2</sub>.

**Table S1.** Comparison of Michaelis-Menten constants ( $K_m$ ) and maximum initial reaction rates ( $V_{max}$ ) of the oxidation reaction catalyzed by Fe<sub>3</sub>O<sub>4</sub>@TiO<sub>2</sub>@MoS<sub>2</sub>, MoS<sub>2</sub>, HRP, TiO<sub>2</sub>@CeO<sub>x</sub>, Fe<sub>3</sub>S<sub>4</sub>, and GO-COOH.

| Catalyst                                                           | $K_m$ (mM)                    |        | $V_{max}$ ( $10^{-7}$ M/s)    |        | References |
|--------------------------------------------------------------------|-------------------------------|--------|-------------------------------|--------|------------|
|                                                                    | H <sub>2</sub> O <sub>2</sub> | TMB    | H <sub>2</sub> O <sub>2</sub> | TMB    |            |
| Fe <sub>3</sub> O <sub>4</sub> @TiO <sub>2</sub> @MoS <sub>2</sub> | 0.6678                        | 4.184  | 2.264                         | 12.86  | This work  |
| MoS <sub>2</sub>                                                   | 1.442                         | 0.1923 | 0.4216                        | 0.4027 | This work  |
| HRP                                                                | 3.7                           | 0.434  | 0.871                         | 1      | 1          |
| TiO <sub>2</sub> @CeO <sub>x</sub>                                 | 1.39                          | 0.3    | 0.55                          | 0.12   | 2          |
| Fe <sub>3</sub> S <sub>4</sub>                                     | 1.158                         | 0.160  | 21.68                         | 11.46  | 3          |
| GO-COOH                                                            | 3.99                          | 0.0237 | 38.5                          | 34.5   | 4          |
| MoO <sub>3-x</sub> DNs                                             | 0.26                          | 2.65   | 1.52                          | 0.0152 | 5          |

## References

1. L. Gao, J. Zhuang, L. Nie, J. Zhang, Y. Zhang, N. Gu, T. Wang, J. Feng, D. Yang, S. Perrett and X. Yan, *Nat Nanotechnol*, 2007, **2**, 577-583.
2. L. Artiglia, S. Agnoli, M. C. Paganini, M. Cattelan and G. Granozzi, *ACS Appl Mater Interfaces*, 2014, **6**, 20130-20136.
3. C. Ding, Y. Yan, D. Xiang, C. Zhang and Y. Xian, *Microchimica Acta*, 2015, **183**, 625-631.
4. Y. Song, K. Qu, C. Zhao, J. Ren and X. Qu, *Adv Mater*, 2010, **22**, 2206-2210.
5. Y. Zhang, D. Li, J. Tan, Z. Chang, X. Liu, W. Ma and Y. Xu, *Small*, 2021, **17**, e2005739.
